# Supplementary material for: Interest of Absolute Eosinopenia as a Marker of Influenza in Outpatients during the Fall-Winter Seasons 2016–2018 in the Greater Paris Area: The SUPERFLUOUS Study
Source: MDPI journal article supplement (doi:10.3390/diagnostics13122115), 2023-06-19
Supplement: s1 [file s1]

**Supplementary Table S1.** Performance of eosinophil count and lymphocyte count to diagnose influenza infection among ambulatory care individuals suffering from viral respiratory tract infections

| Parameter                                   | Sensitivity | Specificity | Predictive Positive Value | Negative Predictive Value |
|---------------------------------------------|-------------|-------------|---------------------------|---------------------------|
| Eosinophil count = 0 /mm <sup>3</sup>       | 33.8%       | 92%         | 92.3%                     | 32.9%                     |
| Lymphocyte count <800/mm <sup>3</sup>       | 56.3%       | 84%         | 90.9%                     | 40.4%                     |
| Winter season                               | 93.2%       | 35.7%       | 82%                       | 62.5%                     |
| Eosinopenia=0/mm <sup>3</sup> during winter | 34.8%       | 87.5%       | 92%                       | 24.5%                     |
